# Supplementary material for: Spermatogenesis in a Man with Complete Deletion of USP9Y
Source: Atypon-hosted journal article supplement (doi:10.1056/nejmoa0806218), 2009-02-25
Supplement: nejm_luddi_881sa1.pdf [file nejm_luddi_881sa1.pdf]

## Supplementary Appendix

This appendix has been provided by the authors to give readers additional information about their work.

Supplement to: Luddi A, Margollicci M, Gambera L, et al. Spermatogenesis in a man with complete deletion of *USP9Y*. *N Engl J Med* 2009;360:881-5.

**Table 1. Primers used for fine mapping of breakpoints.**

|     | Forward (5'→3')                     | Reverse (5'→3')                   |
|-----|-------------------------------------|-----------------------------------|
| P1  | GGCAGGGAAGAGAGTAAGAATTT             | CCGTTCTGTGCACTGTATGTAG            |
| P2  | CTCTGAATCAGAAGTTGGTGCCC             | TCTGAAGAAGGTCATGATAAATGG          |
| P3  | CATGTCCTTGTGAAGGGACC                | TAAGCTATATGCAAAAGCAATGT           |
| P4  | GTCTTGCTCTGTCCCTACACTGG             | GTTAGGAAGCTGAGGTGAGAGG            |
| P5  | GGTGGGATTGGTTCATAGTGTA <sup>*</sup> | GATGCCCTGCAAACCATGCAATTG          |
| P6  | TAAACAGGGTCTCAGTCTGTTGC             | ATACCCTCCCTTTGGAATTCAG            |
| P7  | TGTTTTTCAGGTTGACTTTGGA              | CCCTAACTCCTGTGTCCATCT             |
| P8  | CCTTTTACTTACAGGTGGGAAGG             | CCAGGACACATGGTCACATGGG            |
| P9  | GGTCTGACTCTGCTCTGTGTTCT             | CCCCCTCCTCTCGTCTATCTAT            |
| P10 | CCAATCTGCTGACTTAAATCTCAA            | CAAAGTGGTGAAACCCATCTTTA           |
| P11 | TGATCGATAGATGAGATCGATAGG            | ACTGTGAAATCAGCATGAACCTC           |
| P12 | CCCCACCATACCTAGTGAATTTT             | ACTCCTCCCTGTCCTTTTGTAAG           |
| D1  | AACAAAACCACTGGGGCATA                | GAAGAGGGGAGAGCCTTCAC              |
| D2  | GGCTTTTTTCAGATTGTGGATAC             | CTGGACGGCAGATCCTTCTA <sup>*</sup> |
| D3  | CTGAGGAGGGAAACTGCTTG                | GATGGAGGGATCATGGAAAA              |
| D4  | TCATATAACTCACTGCAGCCTTG             | ATTTCCCCAGTAGCTCCTTCTTA           |

\*Primer sequences used for junction amplification
